# Supplementary material for: Network Protein Interaction in the Link between Stroke and Periodontitis Interplay: A Pilot Bioinformatic Analysis
Source: MDPI journal article supplement (doi:10.3390/genes12050787), 2021-05-20
Supplement: s1 [file s1]

Appendix S1. Genes and their corresponding proteins for Periodontitis

| <b>Mapped gene</b>    | <b>Reported trait</b>   |
|-----------------------|-------------------------|
| GLT6D1                | Periodontitis           |
| AL360006.1, KCNK1     | Periodontal microbiota  |
| PKN2-AS1              | Periodontal microbiota  |
| CLIC5, RUNX2          | Periodontal microbiota  |
| Y_RNA, AC064802.1     | Periodontal microbiota  |
| CAMTA1                | Periodontal microbiota  |
| AF111167.2, LINC01220 | Periodontal microbiota  |
| TENM2                 | Periodontal microbiota  |
| GRID1                 | Periodontal microbiota  |
| AL360006.1, KCNK1     | Periodontal microbiota  |
| AC016751.2, EXTL2P1   | Periodontal microbiota  |
| DAB2IP, AL596244.1    | Periodontal microbiota  |
| Y_RNA, NAMPTP1        | Periodontal microbiota  |
| FAM166C, OTOF         | Periodontal microbiota  |
| FBXO38                | Periodontal microbiota  |
| UHRF2                 | Periodontal microbiota  |
| TBC1D1                | Periodontal microbiota  |
| AC003044.1            | Periodontitis           |
| AL136967.2, FOXP4-AS1 | Periodontitis           |
| ADGRE1                | Periodontitis           |
| TTC6                  | Periodontitis (CDC/AAP) |
| GPN1                  | Periodontitis (CDC/AAP) |
| HLA-DOA               | Periodontitis (CDC/AAP) |
| ITGA8                 | Periodontitis (CDC/AAP) |
| ERGIC1                | Periodontitis (CDC/AAP) |
| LRP1B                 | Periodontitis (CDC/AAP) |
| PRB2, AC078950.1      | Periodontitis (CDC/AAP) |
| C10orf91, AL451069.1  | Periodontitis (CDC/AAP) |
| AL161449.2, Y_RNA     | Periodontitis (CDC/AAP) |
| CEP295NL, TIMP2       | Periodontitis (CDC/AAP) |
| ACTN2                 | Periodontitis (CDC/AAP) |
| KDM4B                 | Periodontitis (CDC/AAP) |
| LINC01828, AC007403.1 | Periodontitis (CDC/AAP) |
| AC022239.2, LINC00208 | Periodontitis (CDC/AAP) |
| AC015987.1            | Periodontitis (CDC/AAP) |
| MFSD1                 | Periodontitis (CDC/AAP) |
| LINC01262, HSP90AA4P  | Periodontitis (CDC/AAP) |
| IGF2R                 | Periodontitis (CDC/AAP) |
| WDR73, SCAND2P        | Periodontitis (CDC/AAP) |
| PARP15                | Periodontitis (CDC/AAP) |
| RPL35AP19, AC068413.1 | Periodontitis (CDC/AAP) |

|                             |                          |
|-----------------------------|--------------------------|
| CSMD1                       | Periodontitis (CDC/AAP)  |
| ETNK2                       | Periodontitis (CDC/AAP)  |
| AC010468.1, AC010468.3      | Periodontitis (PAL4Q3)   |
| THSD4                       | Periodontitis (PAL4Q3)   |
| ROBO2                       | Periodontitis (PAL4Q3)   |
| LINC01748, LINC02778        | Periodontitis (PAL4Q3)   |
| DEFA10P, DEFA9P             | Periodontitis (PAL4Q3)   |
| NKAIN3                      | Periodontitis (PAL4Q3)   |
| PPIAP65, LINC01854          | Periodontitis (PAL4Q3)   |
| IGLV10-54                   | Periodontitis (PAL4Q3)   |
| ROCK1P1                     | Periodontitis (Mean PAL) |
| AC055874.1                  | Periodontitis (Mean PAL) |
| SMURF2                      | Periodontitis (Mean PAL) |
| AC027229.1, RN7SL97P        | Periodontitis (Mean PAL) |
| AC015871.1, ST20-MTHFS      | Periodontitis (Mean PAL) |
| THSD4                       | Periodontitis (Mean PAL) |
| ZNF579                      | Periodontitis (Mean PAL) |
| ABCA1                       | Periodontitis (Mean PAL) |
| MIR8052, BAK1P2             | Periodontitis (Mean PAL) |
| BCORL1, AL034405.1          | Periodontitis (Mean PAL) |
| BIRC5                       | Periodontitis (Mean PAL) |
| AC063949.1, C12orf74        | Periodontitis (Mean PAL) |
| ST20-AS1, AC015871.2        | Periodontitis (Mean PAL) |
| CDH13, AC009063.2           | Periodontitis (Mean PAL) |
| AC114324.2, LINC02062       | Periodontitis (Mean PAL) |
| ICE2P2, NDUFA5P5            | Periodontitis (Mean PAL) |
| AP001042.1                  | Periodontitis (Mean PAL) |
| AC093534.2, RPL35AP15       | Periodontitis (DPAL)     |
| DAOA-AS1, AL138954.1        | Periodontitis (DPAL)     |
| GRIK1                       | Periodontitis (DPAL)     |
| AC093534.2, RPL35AP15       | Periodontitis (DPAL)     |
| NLGN1                       | Periodontitis (DPAL)     |
| AC006059.2, CCDC13          | Periodontitis (DPAL)     |
| PWRN1, AC090983.2           | Periodontitis (DPAL)     |
| SUMF1                       | Periodontitis (DPAL)     |
| LBP                         | Periodontitis (DPAL)     |
| LINC02022                   | Periodontitis (DPAL)     |
| AC005208.1, KCNJ16          | Periodontitis (DPAL)     |
| SCN2A                       | Periodontitis (DPAL)     |
| TGIF1                       | Periodontitis (DPAL)     |
| NPAP1, AC090983.2,<br>PWRN1 | Periodontitis (DPAL)     |
| ZFPM2                       | Periodontitis (DPAL)     |
| PPIAP65, LINC01854          | Periodontitis (PAL4Q3)   |

|                       |                                                   |
|-----------------------|---------------------------------------------------|
| LINC00907             | Periodontitis (PAL4Q3)                            |
| RBFOX1                | Periodontitis (PAL4Q3)                            |
| LINC01933             | Periodontitis (PAL4Q3)                            |
| HMGB1P5, AC092421.1   | Periodontitis (PAL4Q3)                            |
| DEFA10P, DEFA9P       | Periodontitis (PAL4Q3)                            |
| LINC00907             | Periodontitis (PAL4Q3)                            |
| THSD4                 | Periodontitis (PAL4Q3)                            |
| FAM135B               | Periodontitis (PAL4Q3)                            |
| AC010468.1, CAMK4     | Periodontitis (PAL4Q3)                            |
| FAM126A               | Periodontitis (Mean PAL)                          |
| NKAIN2                | Periodontitis (Mean PAL)                          |
| PSMA8                 | Periodontitis (Mean PAL)                          |
| ERC2                  | Periodontitis (Mean PAL)                          |
| MIR8052, BAK1P2       | Periodontitis (Mean PAL)                          |
| ACTN1                 | Periodontitis (Mean PAL)                          |
| DKK1, RPL31P44        | Periodontitis (Mean PAL)                          |
| AL591501.1            | Periodontitis (Mean PAL)                          |
| FIZ1                  | Periodontitis (Mean PAL)                          |
| HMX3, ACADSB          | Periodontitis (Mean PAL)                          |
| HS6ST2                | Periodontitis (Mean PAL)                          |
| LINC01278             | Periodontitis (Mean PAL)                          |
| AC090666.1, LINC01919 | Periodontitis (Mean PAL)                          |
| NKAIN2                | Periodontitis (Mean PAL)                          |
| HNRNPA1P58, NRSN1     | Periodontitis (Mean PAL)                          |
| AC123023.1, LINC01811 | Periodontitis (Mean PAL)                          |
| GDF15                 | Periodontitis (Mean PAL)                          |
| NPM1P2                | Periodontitis (Mean PAL)                          |
| AC063965.1, PTEN      | Periodontitis (Mean PAL)                          |
| PTPRT                 | Periodontitis (Mean PAL)                          |
| CSMD1                 | Periodontitis (CDC/AAP)                           |
| RGMA, AC108457.1      | Periodontitis (CDC/AAP)                           |
| AC022239.2, LINC00208 | Periodontitis (CDC/AAP)                           |
| AC022239.2, LINC00208 | Periodontitis (CDC/AAP)                           |
| KDM4B                 | Periodontitis (CDC/AAP)                           |
| AC090365.1, CDH2      | Periodontal disease-related phenotype (Socransky) |
| FHOD3                 | Periodontal disease-related phenotype (Socransky) |
| LINC02855, HAS2-AS1   | Periodontal disease-related phenotype (Socransky) |
| HSP90AB2P, U6         | Periodontal disease-related phenotype (Socransky) |
| GVINP1                | Periodontal disease-related phenotype (Socransky) |
| AL356124.1            | Periodontal disease-related phenotype (Socransky) |
| HSP90AB2P, U6         | Periodontal disease-related phenotype (Socransky) |
| OSBPL10               | Periodontal disease-related phenotype (Socransky) |
| AL355838.1            | Periodontal disease-related phenotype (Socransky) |

|                       |                                                   |
|-----------------------|---------------------------------------------------|
| CDKL1                 | Periodontal disease-related phenotype (Socransky) |
| CRACR2A               | Chronic periodontitis (localised)                 |
| KCNQ5                 | Periodontitis                                     |
| GPR141, EPDR1         | Periodontitis                                     |
| C5AR1                 | Chronic periodontitis                             |
| DLG2                  | Chronic periodontitis                             |
| SIGLEC5, AC018755.2   | Periodontitis                                     |
| AP000959.1, MAPK6P2   | Periodontitis                                     |
| RNU6-675P, TEX51      | Periodontitis                                     |
| MIR297, LYPLA1P2      | Periodontitis                                     |
| AL109933.3            | Periodontitis                                     |
| LINC01239, AL391117.1 | Periodontitis                                     |
| AL354916.1, CUX2P1    | Periodontitis                                     |
| NUDT5                 | Periodontitis                                     |
| AC004241.1            | Periodontitis                                     |
| HUNK                  | Periodontitis                                     |

## Appendix S2. Genes and their corresponding proteins for stroke

| <b>Mapped gene</b>     | <b>Reported trait</b>                                                          |
|------------------------|--------------------------------------------------------------------------------|
| ZFHX3                  | Cardioembolic stroke (CCSp classification)                                     |
| GNAO1                  | Cardioembolic stroke (CCSp classification)                                     |
| LINC01438, PITX2       | Cardioembolic stroke (CCSp classification)                                     |
| ZFHX3                  | Cardioembolic stroke (TOAST classification)                                    |
| LINC01438, PITX2       | Cardioembolic stroke (TOAST classification)                                    |
| ZFHX3                  | Cardioembolic stroke (CCS and TOAST classification)                            |
| PHF20                  | Cardioembolic stroke (CCS and TOAST classification)                            |
| LINC01438, PITX2       | Cardioembolic stroke (CCS and TOAST classification)                            |
| ZFHX3                  | Cardioembolic stroke (CCS or TOAST classification)                             |
| LINC01438, PITX2       | Cardioembolic stroke (CCS or TOAST classification)                             |
| ZFHX3                  | Cardioembolic stroke (CCSc classification)                                     |
| AC010230.1, AC094104.2 | Cardioembolic stroke (CCSc classification)                                     |
| TTBK1, SLC22A7         | Cardioembolic stroke (CCSc classification)                                     |
| LINC01438, PITX2       | Cardioembolic stroke (CCSc classification)                                     |
| ATG7                   | Small vessel stroke                                                            |
| ATG7                   | Small vessel stroke                                                            |
| KNG1, AC068631.1       | Small vessel stroke                                                            |
| FAT4, ANKRD50          | Small vessel stroke                                                            |
| LINC02487, AL009178.1  | Small vessel stroke                                                            |
| ATP6V1C1, MTND1P5      | Small vessel stroke                                                            |
| DIO2-AS1               | Small vessel stroke                                                            |
| SH2B3, ATXN2           | Small vessel stroke (CCSp classification)                                      |
| BRAP, ATXN2-AS         | Small vessel stroke (CCSp classification)                                      |
| CAMK2D                 | Small vessel stroke (CCS and TOAST classification)                             |
| SH2B3, ATXN2           | Small vessel stroke (CCS or TOAST classification)                              |
| HDAC9, TWIST1          | Large artery stroke (CCSp classification)j                                     |
| AL049825.1, LINC01765  | Large artery stroke (CCSp classification)j                                     |
| HDAC9, TWIST1          | Large artery stroke (TOAST classification)                                     |
| LINC01492              | Large artery stroke (TOAST classification)                                     |
| HDAC9, TWIST1          | Large artery stroke (CCS and TOAST classification)                             |
| AL049825.1, LINC01765  | Large artery stroke (CCS and TOAST classification)                             |
| HDAC9, TWIST1          | Large artery stroke (CCS or TOAST classification)                              |
| AL049825.1, LINC01765  | Large artery stroke (CCS or TOAST classification)                              |
| AL109838.1, BTBD3      | 3-month functional outcome in lacunar ischaemic stroke (modified Rankin score) |
| AL133240.1, CPSF2      | 3-month functional outcome in lacunar ischaemic stroke (modified Rankin score) |
| SERPINA1               | Large artery stroke                                                            |
| HDAC9                  | Large artery stroke                                                            |
| ACP1                   | Large artery stroke                                                            |
| AC007318.2, AC007318.3 | Large artery stroke                                                            |

|                        |                     |
|------------------------|---------------------|
| SH3YL1                 | Large artery stroke |
| DTL                    | Large artery stroke |
| MCHR1                  | Large artery stroke |
| CARD9                  | Large artery stroke |
| ADAMTS2                | Stroke (pediatric)  |
| ADAMTS12               | Stroke (pediatric)  |
| TRIM29                 | Stroke (pediatric)  |
| TRIM29                 | Stroke (pediatric)  |
| PITX2, LINC01438       | Stroke (ischemic)   |
| IMPA2                  | Stroke              |
| LINC00458, LINC00558   | Stroke              |
| CRYBG1                 | Stroke              |
| RPL36AP26, AC006041.2  | Stroke              |
| PTPRG                  | Stroke              |
| SPINK2                 | Stroke              |
| TGFBI                  | Stroke              |
| AL356094.2, AL356094.1 | Stroke              |
| LINC00709, AC044784.1  | Stroke              |
| WDFY4                  | Stroke              |
| MICAL2                 | Stroke              |
| ALDH1A2                | Stroke              |
| CHD3                   | Stroke              |
| AP001347.1             | Stroke              |
| CLDN17, AF096876.1     | Stroke              |
| AL606519.1             | Stroke              |
| RNU6-1180P, IL1RN      | Stroke              |
| PTPRG                  | Stroke              |
| LINC01411, SUMO2P6     | Stroke              |
| AC016573.1             | Stroke              |
| AL356094.2, AL356094.1 | Stroke              |
| HDAC9                  | Stroke              |
| LINC00709, AC044784.1  | Stroke              |
| WDFY4                  | Stroke              |
| MIR100HG               | Stroke              |
| AC018659.2, RMST       | Stroke              |
| AL356807.1, MTND4P33   | Stroke              |
| AL356807.1             | Stroke              |
| ALDH1A2                | Stroke              |
| AP001347.1             | Stroke              |
| CLDN17, AF096876.1     | Stroke              |
| NOS3                   | Stroke              |
| COL4A1                 | Stroke              |
| AP001407.1, DYRK1A     | Stroke              |

|                        |                                                                                            |
|------------------------|--------------------------------------------------------------------------------------------|
| LINC02455, NINJ2-AS1   | Stroke                                                                                     |
| AC244502.1             | Cardiovascular death, myocardial infarction or stroke in response to clopidogrel treatment |
| RNU6-144P, ZYXP1       | Cardiovascular death, myocardial infarction or stroke in response to clopidogrel treatment |
| PRKG1                  | Cardiovascular death, myocardial infarction or stroke in response to clopidogrel treatment |
| WFDC1                  | Cardiovascular death, myocardial infarction or stroke in response to clopidogrel treatment |
| LHFPL2                 | Cardiovascular death, myocardial infarction or stroke in response to clopidogrel treatment |
| MICAL2                 | Cardiovascular death, myocardial infarction or stroke in response to clopidogrel treatment |
| HDAC9                  | Stroke                                                                                     |
| HDAC9, TWIST1          | Stroke (ischemic)                                                                          |
| HDAC9, TWIST1          | Stroke (ischemic)                                                                          |
| LINC01438              | Stroke (ischemic)                                                                          |
| LINC01438              | Stroke (ischemic)                                                                          |
| ZFHX3                  | Stroke (ischemic)                                                                          |
| SPSB4                  | Stroke (ischemic)                                                                          |
| ASB3                   | Stroke (ischemic)                                                                          |
| AC002996.1, ALDH2      | Stroke (ischemic)                                                                          |
| BSX, AP003040.1        | Age-related diseases and mortality                                                         |
| AC125807.2, AC125807.1 | Age-related diseases and mortality                                                         |
| GRHL1                  | Age-related diseases and mortality                                                         |
| AC079248.1, RNU7-2P    | Age-related diseases and mortality                                                         |
| ITPK1                  | Age-related diseases and mortality                                                         |
| SEMA5B                 | Age-related diseases and mortality                                                         |
| ZFHX3                  | Age-related diseases and mortality                                                         |
| DNAH2                  | Age-related diseases and mortality                                                         |
| AC003986.1, AC007091.1 | Age-related diseases and mortality                                                         |
| AKR1B1P6, THEMIS3P     | Age-related diseases and mortality                                                         |
| CDKN2B-AS1             | Age-related diseases and mortality                                                         |
| TMPRSS2, MX1           | Age-related diseases and mortality                                                         |
| ANKRD26, FAM238C       | Age-related diseases and mortality                                                         |
| TCF7L2                 | Age-related diseases and mortality                                                         |
| FADS1, FADS2           | Age-related diseases, mortality and associated endophenotypes                              |
| ZPR1                   | Age-related diseases, mortality and associated endophenotypes                              |
| SIK3                   | Age-related diseases, mortality and associated endophenotypes                              |

|                         |                                                               |
|-------------------------|---------------------------------------------------------------|
| BSX, AP003040.1         | Age-related diseases, mortality and associated endophenotypes |
| AC125807.2, AC125807.1  | Age-related diseases, mortality and associated endophenotypes |
| ATP2B1                  | Age-related diseases, mortality and associated endophenotypes |
| ZCCHC8                  | Age-related diseases, mortality and associated endophenotypes |
| ITPK1                   | Age-related diseases, mortality and associated endophenotypes |
| ALDH1A2, LIPC, LIPC-AS1 | Age-related diseases, mortality and associated endophenotypes |
| FTO                     | Age-related diseases, mortality and associated endophenotypes |
| HERPUD1, CETP           | Age-related diseases, mortality and associated endophenotypes |
| ZFHx3                   | Age-related diseases, mortality and associated endophenotypes |
| AKR1B1P6, THEMIS3P      | Age-related diseases, mortality and associated endophenotypes |
| SUGP1                   | Age-related diseases, mortality and associated endophenotypes |
| APOC1, APOC1P1          | Age-related diseases, mortality and associated endophenotypes |
| AC243964.2, BCL3        | Age-related diseases, mortality and associated endophenotypes |
| CELSR2                  | Age-related diseases, mortality and associated endophenotypes |
| GRHL1                   | Age-related diseases, mortality and associated endophenotypes |
| AC010872.2, APOB        | Age-related diseases, mortality and associated endophenotypes |
| TDRD15, AC067959.1      | Age-related diseases, mortality and associated endophenotypes |
| SLC30A3                 | Age-related diseases, mortality and associated endophenotypes |
| NRBP1, PPM1G            | Age-related diseases, mortality and associated endophenotypes |
| GCKR                    | Age-related diseases, mortality and associated endophenotypes |
| AC079248.1, RNU7-2P     | Age-related diseases, mortality and associated endophenotypes |
| ABCA12                  | Age-related diseases, mortality and associated endophenotypes |
| SEMA5B                  | Age-related diseases, mortality and associated endophenotypes |
| SLC39A8                 | Age-related diseases, mortality and associated endophenotypes |
| MIR297, LINC01438       | Age-related diseases, mortality and associated endophenotypes |
| MAML3                   | Age-related diseases, mortality and associated endophenotypes |



|                        |                                                               |
|------------------------|---------------------------------------------------------------|
| AC008897.2             | Age-related diseases, mortality and associated endophenotypes |
| CERT1                  | Age-related diseases, mortality and associated endophenotypes |
| POLK                   | Age-related diseases, mortality and associated endophenotypes |
| POC5                   | Age-related diseases, mortality and associated endophenotypes |
| AC003986.1, AC007091.1 | Age-related diseases, mortality and associated endophenotypes |
| BAZ1B                  | Age-related diseases, mortality and associated endophenotypes |
| VPS37D, MLXIPL         | Age-related diseases, mortality and associated endophenotypes |
| AC100802.1, LPL        | Age-related diseases, mortality and associated endophenotypes |
| AC091114.1, TRIB1      | Age-related diseases, mortality and associated endophenotypes |
| CDKN2B-AS1             | Age-related diseases, mortality and associated endophenotypes |
| PLCG1                  | Age-related diseases, mortality and associated endophenotypes |
| ADI1P1, ZHX3           | Age-related diseases, mortality and associated endophenotypes |
| TMPRSS2, MX1           | Age-related diseases, mortality and associated endophenotypes |
| ANKRD26, FAM238C       | Age-related diseases, mortality and associated endophenotypes |
| TCF7L2                 | Age-related diseases, mortality and associated endophenotypes |
| LINC01394, AL034346.1  | Stroke                                                        |
| MRPL58, RNU6-362P      | Alzheimer's disease or small vessel stroke                    |
| FGA, FGB               | Stroke                                                        |
| PDE3A                  | Stroke                                                        |
| CDKN2B-AS1             | Stroke                                                        |
| SMARCA4                | Stroke                                                        |
| CASZ1                  | Stroke                                                        |
| COL4A1                 | Stroke                                                        |
| LRCH1                  | Stroke                                                        |
| PMF1-BGLAP, PMF1       | Stroke                                                        |
| AC010255.3             | Stroke                                                        |
| WNT2B                  | Stroke                                                        |
| AC092720.1, AC092720.3 | Stroke                                                        |
| ZFHX3                  | Stroke                                                        |
| LINC01438, PITX2       | Stroke                                                        |
| TTBK1, SLC22A7         | Stroke                                                        |
| BOLA3P1, RNU7-159P     | Stroke                                                        |
| HDAC9, TWIST1          | Stroke                                                        |

|                          |                     |
|--------------------------|---------------------|
| ILF3                     | Stroke              |
| SH3PXD2A, AL133355.1     | Stroke              |
| SH2B3, ATXN2             | Stroke              |
| AC017007.5, ANK2         | Stroke              |
| LINC02828                | Stroke              |
| CDK6                     | Stroke              |
| LINC01394, AL034346.1    | Stroke              |
| ABO, AL772161.2          | Stroke              |
| FGA, FGB                 | Stroke              |
| PMF1-BGLAP, PMF1         | Stroke              |
| PRPF8                    | Stroke              |
| AC010255.3               | Stroke              |
| WNT2B                    | Stroke              |
| RN7SL568P, CNOT6LP1      | Stroke              |
| AC092720.1, AC092720.3   | Stroke              |
| KCNK3                    | Stroke              |
| ZFH3                     | Stroke              |
| LINC01438, PITX2         | Stroke              |
| TTBK1, SLC22A7           | Stroke              |
| BOLA3P1, RNU7-159P       | Stroke              |
| HDAC9, TWIST1            | Stroke              |
| ILF3                     | Stroke              |
| SH3PXD2A, AL133355.1     | Stroke              |
| TSPOAP1-AS1, AC004687.2, |                     |
| RNF43                    | Stroke              |
| SH2B3, ATXN2             | Stroke              |
| RPS10P21, AL139003.1     | Stroke              |
| AC017007.5, ANK2         | Stroke              |
| AC078880.1, AC008125.1   | Stroke              |
| CDK6                     | Stroke              |
| RN7SL363P, FURIN         | Stroke              |
| LINC01394, AL034346.1    | Stroke              |
| HTRA1                    | Stroke              |
| ABO, AL772161.2          | Stroke              |
| PTPRF                    | Stroke              |
| HDAC9, TWIST1            | Large artery stroke |
| CWF19L2, ALKBH8          | Large artery stroke |
| LINC02113, GUSBP8        | Large artery stroke |
| TTLL5                    | Large artery stroke |
| CDKN2B-AS1               | Large artery stroke |
| AL136140.2, AL133334.1   | Large artery stroke |
| TMEM63C, AC007375.2,     |                     |
| ZDHHC22                  | Large artery stroke |
| RPL21P111, OBI1          | Large artery stroke |

|                        |                                                |
|------------------------|------------------------------------------------|
| TMEM163                | Large artery stroke                            |
| CACNB2                 | Small vessel stroke                            |
| AC092720.1, AC092720.3 | Small vessel stroke                            |
| CDKN2B-AS1             | Coronary artery disease or large artery stroke |
| LPA                    | Coronary artery disease or large artery stroke |
| HDAC9, TWIST1          | Coronary artery disease or large artery stroke |
| SMARCA4                | Coronary artery disease or large artery stroke |
| PHACTR1                | Coronary artery disease or large artery stroke |
| ATXN2-AS, BRAP         | Coronary artery disease or large artery stroke |
| PSRC1, CELSR2          | Coronary artery disease or large artery stroke |
| TCF21                  | Coronary artery disease or large artery stroke |
| EDNRA, PRMT5P1         | Coronary artery disease or large artery stroke |
| PLPP3, AC119674.2      | Coronary artery disease or large artery stroke |
| WDR12                  | Coronary artery disease or large artery stroke |
| AC020558.5, SMCR2      | Coronary artery disease or large artery stroke |
| ZC3HC1, AC073320.2     | Coronary artery disease or large artery stroke |
| ZPR1                   | Coronary artery disease or large artery stroke |
| CNNM2                  | Coronary artery disease or large artery stroke |
| AC022748.2, CHRNA4     | Coronary artery disease or large artery stroke |
| ABO, AL772161.2        | Coronary artery disease or large artery stroke |
| AC022335.1, SLC01B1    | Ischemic stroke (large artery atherosclerosis) |
| FAF1                   | Ischemic stroke (large artery atherosclerosis) |
| CDKN2C                 | Ischemic stroke (large artery atherosclerosis) |
| HDAC9                  | Large artery stroke                            |
| TOM1L1                 | Large artery stroke                            |
| AC113386.1             | Large artery stroke                            |
| LINC02488, AC018754.1  | Large artery stroke                            |
| RGS9, LINC02563        | Large artery stroke                            |
| PARK7                  | Ischemic stroke                                |
| SHISA6                 | Ischemic stroke                                |
| NAA25                  | Ischemic stroke                                |
| LINC01438, PITX2       | Ischemic stroke                                |
| AL034417.3             | Ischemic stroke                                |
| SPSB4                  | Ischemic stroke                                |
| PHACTR1                | Coronary artery disease or ischemic stroke     |
| ZC3HC1, AC073320.2     | Coronary artery disease or ischemic stroke     |
| ABO, AL772161.2        | Coronary artery disease or ischemic stroke     |
| AC022748.3, AC022748.2 | Coronary artery disease or ischemic stroke     |
| PSRC1, CELSR2          | Coronary artery disease or ischemic stroke     |
| SMCR2, AC020558.5      | Coronary artery disease or ischemic stroke     |
| WDR12                  | Coronary artery disease or ischemic stroke     |
| TCF21                  | Coronary artery disease or ischemic stroke     |
| PLPP3, AC119674.2      | Coronary artery disease or ischemic stroke     |

|                        |                                                |
|------------------------|------------------------------------------------|
| LINC01626, AL035467.2  | Coronary artery disease or ischemic stroke     |
| CDKN2B-AS1             | Coronary artery disease or ischemic stroke     |
| ATXN2-AS, BRAP         | Coronary artery disease or ischemic stroke     |
| LPA                    | Coronary artery disease or ischemic stroke     |
| SMARCA4                | Coronary artery disease or ischemic stroke     |
| KNG1, AC068631.1       | Thrombosis                                     |
| F2                     | Thrombosis                                     |
| LRAT, FGG              | Thrombosis                                     |
| F5                     | Thrombosis                                     |
| FUNDC2                 | Thrombosis                                     |
| SLC44A2                | Thrombosis                                     |
| PROCR                  | Thrombosis                                     |
| COX7A2L                | Thrombosis                                     |
| TSPAN15                | Thrombosis                                     |
| AL357518.2, AL357518.1 | Thrombosis                                     |
| GAPDHP50, ICE2P2       | Thrombosis                                     |
| ABO                    | Thrombosis                                     |
| F11-AS1                | Thrombosis                                     |
| AL136140.2, AL133334.1 | Stroke (ischemic)                              |
| LINC01765, AL049825.1  | Ischemic stroke (large artery atherosclerosis) |
| HDAC9                  | Ischemic stroke (large artery atherosclerosis) |
| F11-AS1                | Ischemic stroke (cardioembolic)                |
| CAV2                   | Ischemic stroke (cardioembolic)                |
| ABO, AL772161.2        | Ischemic stroke (cardioembolic)                |
| AL023495.1             | Ischemic stroke (cardioembolic)                |
| BNIP1, RPL7AP33        | Ischemic stroke (cardioembolic)                |
| NEURL1                 | Ischemic stroke (cardioembolic)                |
| HK1                    | Ischemic stroke (cardioembolic)                |
| ZFH3                   | Ischemic stroke (cardioembolic)                |
| LINC01438, PITX2       | Ischemic stroke (cardioembolic)                |
| AC011029.1, HNF4G      | Ischemic stroke (cardioembolic)                |
| ZFH3                   | Ischemic stroke (cardioembolic)                |
| LINC01438, PITX2       | Ischemic stroke (cardioembolic)                |
| RGS7                   | Ischemic stroke (cardioembolic)                |
| ABO, AL772161.2        | Ischemic stroke (cardioembolic)                |
| BNIP1, RPL7AP33        | Ischemic stroke (cardioembolic)                |
| NBEAL1                 | Ischemic stroke (small-vessel)                 |
| CAMK2D                 | Ischemic stroke (small-vessel)                 |
| COL4A2                 | Ischemic stroke (small-vessel)                 |
| CASZ1                  | Ischemic stroke (small-vessel)                 |
| PMF1-BGLAP, PMF1       | Ischemic stroke (small-vessel)                 |
| AC010255.3             | Ischemic stroke (small-vessel)                 |
| SH3PXD2A, AL133355.1   | Ischemic stroke (small-vessel)                 |

|                        |                                                |
|------------------------|------------------------------------------------|
| SH2B3, ATXN2           | Ischemic stroke (small-vessel)                 |
| AC092720.1, AC092720.3 | Ischemic stroke (small-vessel)                 |
| LINC01394, AL034346.1  | Ischemic stroke (small-vessel)                 |
| AC092720.1, AC092720.3 | Ischemic stroke (small-vessel)                 |
| LINC01492              | Ischemic stroke (large artery atherosclerosis) |
| AL049825.1, LINC01765  | Ischemic stroke (large artery atherosclerosis) |
| AC093908.1, EDNRA      | Ischemic stroke (large artery atherosclerosis) |
| HDAC9, TWIST1          | Ischemic stroke (large artery atherosclerosis) |
| MMP12, MMP3            | Ischemic stroke (large artery atherosclerosis) |
| AC108751.2, AC108751.3 | Ischemic stroke (large artery atherosclerosis) |
| LINC01492              | Ischemic stroke (large artery atherosclerosis) |
| AL049825.1, LINC01765  | Ischemic stroke (large artery atherosclerosis) |
| FARP1                  | Ischemic stroke (large artery atherosclerosis) |
| AC093908.1, EDNRA      | Ischemic stroke (large artery atherosclerosis) |
| HDAC9, TWIST1          | Ischemic stroke (large artery atherosclerosis) |
| SH2B3, ATXN2           | Ischemic stroke (large artery atherosclerosis) |
| AL109933.2             | Ischemic stroke (large artery atherosclerosis) |
| MMP12, MMP3            | Ischemic stroke (large artery atherosclerosis) |
| CDKN2B-AS1             | Stroke                                         |
| SMARCA4                | Stroke                                         |
| CASZ1                  | Stroke                                         |
| LRCH1                  | Stroke                                         |

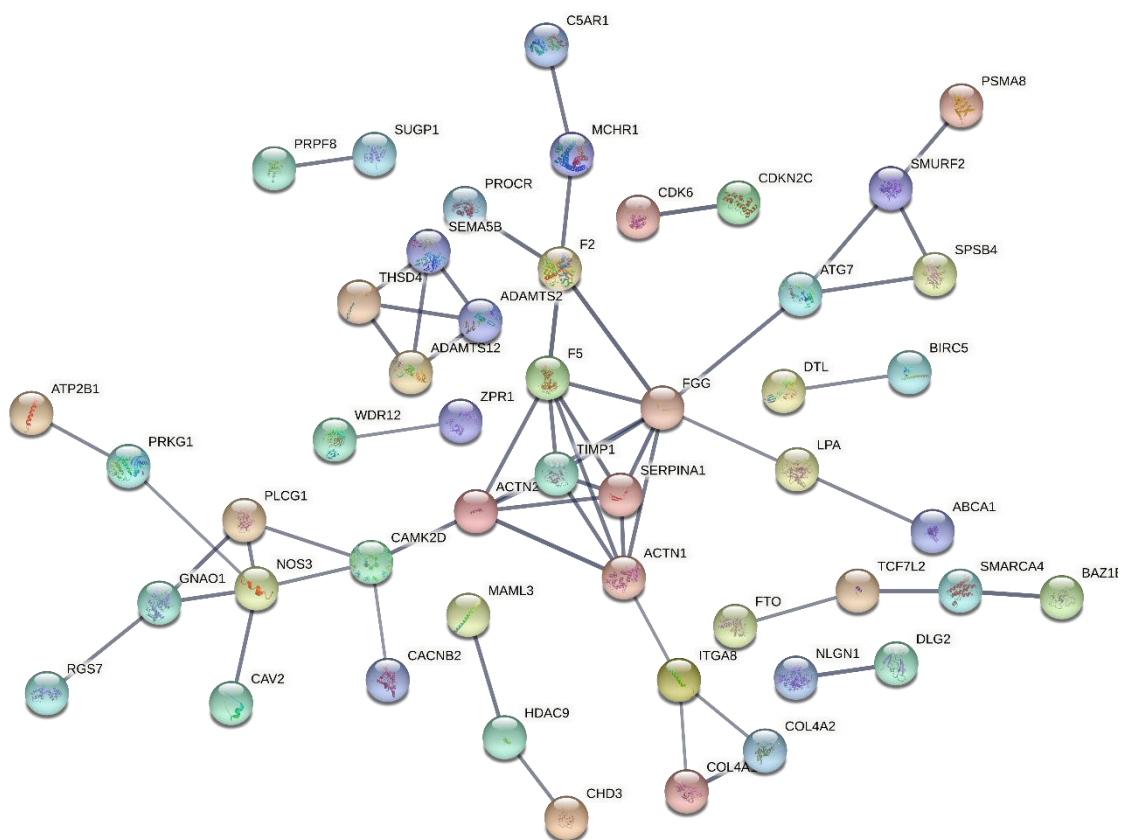

Appendix S3. PPI Network with confidence cut-off of 0.7.

number of nodes: 148  
 number of edges: 58  
 average node degree: 0.784  
 avg. local clustering coefficient: 0.243  
 expected number of edges: 41  
 PPI enrichment p-value: 0.00751

Appendix S4. PPI Network using Genemania tool.

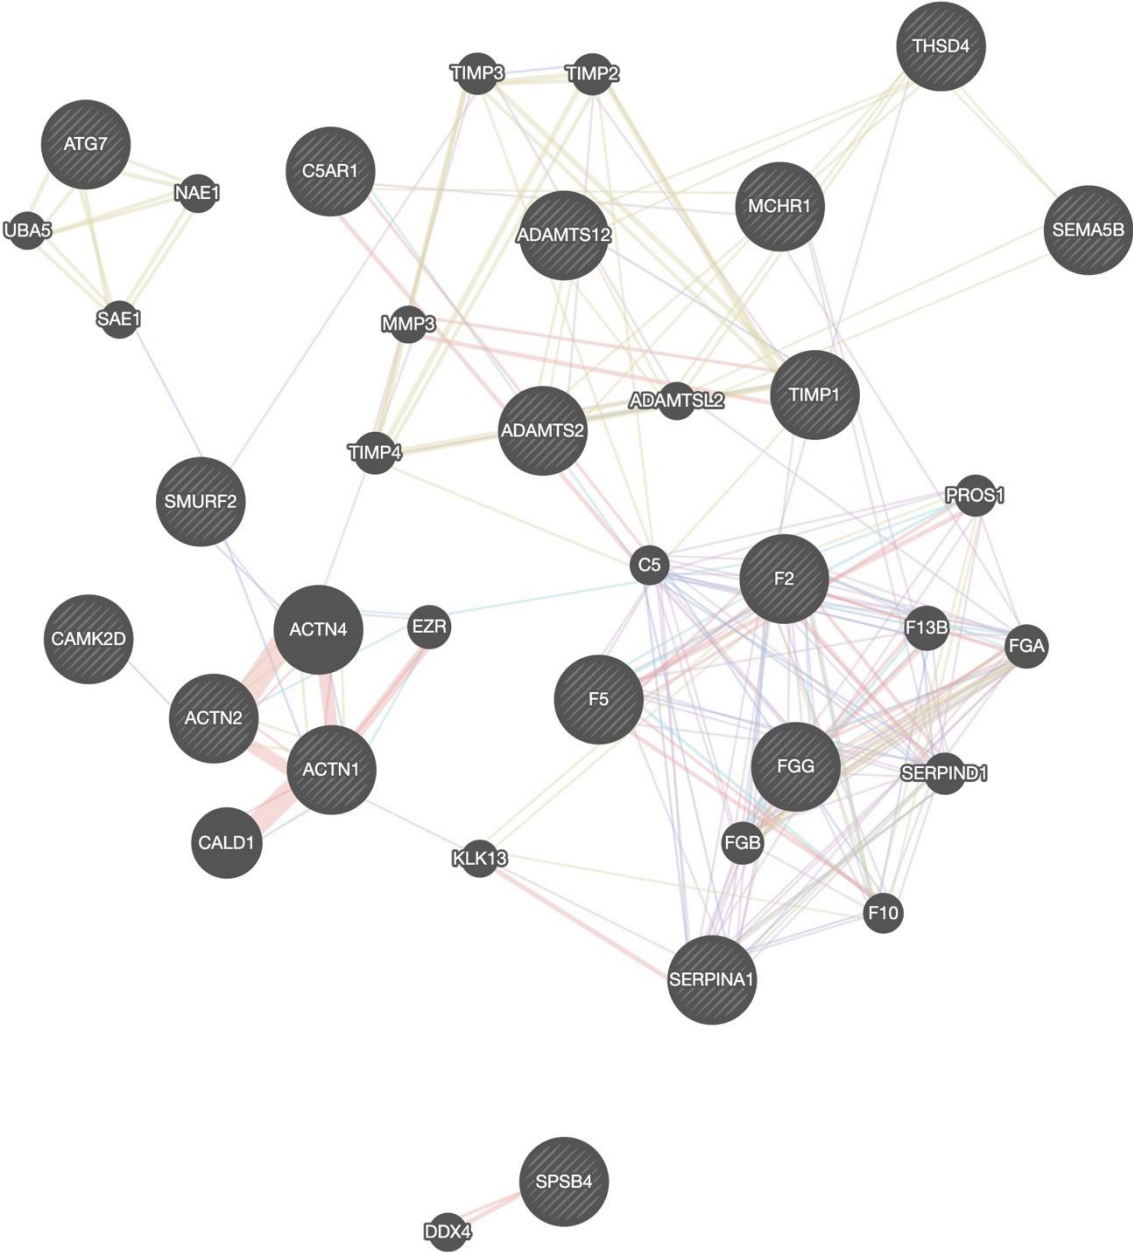

Appendix S5. Enrichment analysis

| Pathway     | Description                                                       | Count in Network | Strength | False Discovery Rate |
|-------------|-------------------------------------------------------------------|------------------|----------|----------------------|
| HSA-140875  | Common Pathway of Fibrin Clot Formation                           | 4 of 22          | 1.38     | 0.0211               |
| HSA-442729  | CREB phosphorylation through the activation of CaMKII             | 3 of 18          | 1.34     | 0.0328               |
| HSA-442982  | Ras activation upon Ca <sup>2+</sup> influx through NMDA receptor | 3 of 20          | 1.3      | 0.0384               |
| HSA-438066  | Unblocking of NMDA receptors, glutamate binding and activation    | 3 of 20          | 1.3      | 0.0384               |
| HSA-5083635 | Defective B3GALT1 causes Peters-plus syndrome (PpS)               | 4 of 37          | 1.16     | 0.0262               |
| HSA-5173214 | O-glycosylation of TSR domain-containing proteins                 | 4 of 38          | 1.14     | 0.0262               |
| HSA-114608  | Platelet degranulation                                            | 7 of 125         | 0.87     | 0.0211               |
| HSA-76002   | Platelet activation, signaling and aggregation                    | 8 of 256         | 0.62     | 0.0418               |
| HSA-109582  | Hemostasis                                                        | 15 of 601        | 0.52     | 0.0211               |
